# Supplementary material for: Different patterns of belowground fungal diversity along altitudinal gradients with respect to microhabitat and guild types
Source: Research Square preprint supplement (doi:10.21203/rs.3.rs-277233/v1), 2021-03-15
Supplement: Supplementary file 1 [file d4431442c379a146afdd612b.xlsx]

## Sheet: Supplementary Table 2
Supplementary Table 2. List of genera (>0.1% relative abundance) and their ecological roles
Taxonomy							Relative abundance (%)
Phylum	Class	Order	Family	Genus	Guild	Confidence Ranking	Total	Root_total	Root_Low	Root_Mid	Root_High	Soil_total	Soil_Low	Soil_Mid	Soil_High
Basidiomycota	Agaricomycetes	Thelephorales	Thelephoraceae	Tomentella	Ectomycorrhiza	Highly Probable	5.544	3.99451	3.3058	3.07857	5.35406	7.15548	6.70049	6.61714	7.99362
Basidiomycota	Geminibasidiomycetes	Geminibasidiales	Geminibasidiaceae	Geminibasidium	Saprotroph	Probable	4.66457	0.427198	0.602679	0.215	0.464901	9.07143	13.9756	10.9593	3.53253
Basidiomycota	Agaricomycetes	Boletales	Suillaceae	Suillus	Ectomycorrhiza	Highly Probable	4.39006	7.27038	4.58557	7.49571	9.29803	1.39452	0.375812	1.06071	2.49298
Ascomycota	Leotiomycetes	Helotiales	Myxotrichaceae	Oidiodendron	Ericoid mycorrhiza	Probable	3.93219	2.28045	2.11682	2.46357	2.258	5.65	5.20942	6.58429	5.16199
Basidiomycota	Agaricomycetes	Agaricales	Cortinariaceae	Cortinarius	Ectomycorrhiza	Highly Probable	3.64601	2.0435	1.89658	4.16929	0.332512	5.31262	6.82549	5.33643	4.10268
Basidiomycota	Agaricomycetes	Agaricales	Mycenaceae	Mycena	Saprotroph + plant pathogen	Probable	3.44678	6.21978	6.8936	6.13429	5.73584	0.562857	0.320617	0.765714	0.572066
Basidiomycota	Agaricomycetes	Agaricales	Tricholomataceae	Tricholoma	Ectomycorrhiza	Highly Probable	3.35784	0.507555	1.34375	0.205714	0.0757389	6.32214	1.87906	6.09857	10.0128
Mortierellomycota	Mortierellomycetes	Mortierellales	Mortierellaceae	Mortierella	Saprotroph + endophyte	Probable	3.22106	3.58951	1.58333	1.43357	7.10837	2.83786	4.46347	2.13429	2.18878
Mucoromycota	Umbelopsidomycetes	Umbelopsidales	Umbelopsidaceae	Umbelopsis	Saprotroph	Probable	3.18989	1.57875	1.88318	1.04643	1.78571	4.86548	6.51299	4.51929	3.8801
Basidiomycota	Agaricomycetes	Agaricales	Inocybaceae	Inocybe	Ectomycorrhiza	Probable	2.79634	1.03938	0.967262	1.04	1.09852	4.62357	2.01136	4.08429	7.15753
Basidiomycota	Agaricomycetes	Russulales	Russulaceae	Russula	Ectomycorrhiza	Highly Probable	2.57937	1.48375	1.91741	2.15143	0.549261	3.71881	4.31412	5.3	1.83929
Ascomycota	Sordariomycetes	Hypocreales	Hypocreaceae	Trichoderma	Saprotroph	Probable	2.41305	3.83631	3.38095	3.01214	4.92365	0.932857	1.53653	0.827857	0.552296
Basidiomycota	Agaricomycetes	Auriculariales	Exidiaceae	Basidiodendron	Saprotroph	Probable	2.27124	4.08104	6.43973	5.70857	0.725985	0.389048	0.388799	0.609286	0.192602
Ascomycota	Leotiomycetes	Helotiales	Vibrisseaceae	Phialocephala	Endophyte	Highly Probable	2.26914	4.20375	2.70685	4.65143	5.05665	0.257143	0.290584	0.213571	0.26977
Basidiomycota	Agaricomycetes	Thelephorales	Bankeraceae	Phellodon	Ectomycorrhiza	Highly Probable	2.13515	2.27106	0.0528274	5.68571	1.16318	1.99381	0.117695	5.23857	0.570791
Basidiomycota	Agaricomycetes	Agaricales	Amanitaceae	Amanita	Ectomycorrhiza	Highly Probable	1.82061	0.739011	1.06622	0.575	0.609606	2.94548	3.05438	1.41571	4.22577
Basidiomycota	Agaricomycetes	Thelephorales	Thelephoraceae	Pseudotomentella	Ectomycorrhiza	Probable	1.6613	2.94986	1.11756	7.98857	0.122537	0.32119	0.261364	0.619286	0.102041
Ascomycota	Eurotiomycetes	Chaetothyriales	Herpotrichiellaceae	Cladophialophora	Saprotroph	Probable	1.51996	1.80563	1.25	2.485	1.6798	1.22286	1.12906	1.57786	0.979592
Ascomycota	Eurotiomycetes	Eurotiales	Aspergillaceae	Penicillium	Saprotroph	Probable	1.33287	1.53892	1.69717	1.24643	1.6601	1.11857	1.33036	1.39286	0.70727
Basidiomycota	Agaricomycetes	Cantharellales	Hydnaceae	Hydnum	Ectomycorrhiza	Highly Probable	1.21125	0.406593	0.338542	0.832143	0.0960591	2.0481	2.32711	2.085	1.79592
Basidiomycota	Agaricomycetes	Agaricales	Cyphellaceae	Rectipilus	Saprotroph	Probable	1.14507	2.22688	0.0558036	0.535714	5.48153	0.02	0.0243506	0.00285714	0.0318878
Ascomycota	Dothideomycetes	Venturiales	Venturiaceae	Venturia	Others (Plant pathogen)	Probable	0.992414	1.85211	0.940476	1.55143	2.86576	0.0983333	0.0600649	0.127857	0.102041
Basidiomycota	Agaricomycetes	Polyporales	Meruliaceae	Gloeoporus	Saprotroph	Highly Probable	0.953665	1.86905	3.91146	0.637857	1.24015	0.00166667	0	0.005	0
Basidiomycota	Agaricomycetes	Agaricales	Omphalotaceae	Mycetinis	Saprotroph	Probable	0.950047	1.83059	0.0677083	1.07571	3.94027	0.0342857	0.0146104	0.0735714	0.0146684
Basidiomycota	Agaricomycetes	Thelephorales	Bankeraceae	Sarcodon	Ectomycorrhiza	Highly Probable	0.946312	0.483288	0.292411	0.0514286	1.01355	1.42786	0.330357	1.00786	2.66518
Basidiomycota	Agaricomycetes	Agaricales	Tricholomataceae	Clitocybula	Saprotroph	Probable	0.920168	1.7745	4.80952	0.0542857	0.74569	0.0316667	0.0746753	0.00571429	0.0210459
Basidiomycota	Agaricomycetes	Boletales	Rhizopogonaceae	Rhizopogon	Ectomycorrhiza	Highly Probable	0.905462	1.24588	0.230655	0.636429	2.61145	0.551429	0.222403	0.845	0.547832
Ascomycota	Eurotiomycetes	Eurotiales	Aspergillaceae	Phialomyces	Saprotroph	Possible	0.878268	0.218407	0.260417	0.0492857	0.329433	1.56452	3.56169	0.738571	0.732781
Basidiomycota	Agaricomycetes	Polyporales	Polyporaceae	Favolus	Saprotroph	Probable	0.79085	1.54579	3.33482	0.517143	0.95197	0.00571429	0	0.0171429	0
Basidiomycota	Agaricomycetes	Polyporales	Incertaesedis	Crustodontia	Saprotroph	Probable	0.785014	1.53411	3.21726	0.520714	1.01478	0.00595238	0	0.0178571	0
Basidiomycota	Agaricomycetes	Agaricales	Hydnangiaceae	Laccaria	Ectomycorrhiza	Highly Probable	0.75105	0.133242	0.289435	0.0342857	0.0892857	1.39357	0.50487	0.0957143	3.25064
Basidiomycota	Tremellomycetes	Tremellales	Trimorphomycetaceae	Saitozyma	Saprotroph	Possible	0.72549	0.387363	0.545387	0.305714	0.32697	1.07714	2.06088	0.597857	0.732143
Basidiomycota	Agaricomycetes	Thelephorales	Bankeraceae	Hydnellum	Ectomycorrhiza	Highly Probable	0.71592	0.475733	0.0431548	1.36143	0.070197	0.965714	0.160714	1.61857	1.01531
Basidiomycota	Agaricomycetes	Agaricales	Tricholomataceae	Delicatula	Ectomycorrhiza	Probable	0.65056	1.22459	0.094494	1.41214	1.99815	0.0535714	0.0373377	0.112143	0.0140306
Basidiomycota	Agaricomycetes	Boletales	Astraeaceae	Astraeus	Ectomycorrhiza	Highly Probable	0.606559	0.8837	1.39509	1.23	0.161946	0.318333	0.233766	0.383571	0.326531
Basidiomycota	Agaricomycetes	Russulales	Russulaceae	Lactarius	Ectomycorrhiza	Highly Probable	0.591737	1.00916	0.945685	1.48357	0.652709	0.157619	0.0503247	0.167143	0.233418
Basidiomycota	Agaricomycetes	Atheliales	Atheliaceae	Piloderma	Ectomycorrhiza	Highly Probable	0.551587	0.54304	0.113839	0.119286	1.26355	0.560476	0.372565	0.232143	1.00128
Basidiomycota	Agaricomycetes	Atheliales	Atheliaceae	Amphinema	Ectomycorrhiza	Highly Probable	0.505369	0.101419	0.0483631	0.182143	0.0757389	0.925476	0.701299	0.482857	1.49681
Basidiomycota	Agaricomycetes	Boletales	Boletaceae	Tylopilus	Ectomycorrhiza	Highly Probable	0.495682	0.246337	0.0111607	0.00285714	0.650862	0.755	0.00649351	0.035	1.98597
Basidiomycota	Agaricomycetes	Cantharellales	Cantharellales_fam_Incertae_sedis	Sistotrema	Ectomycorrhiza	Probable	0.485061	0.356685	0.101935	0.753571	0.225369	0.618571	0.252435	1.00143	0.564413
Ascomycota	Dothideomycetes	Mytilinidales	Gloniaceae	Cenococcum	Ectomycorrhiza	Highly Probable	0.473039	0.53457	0.424851	0.648571	0.527094	0.409048	0.349838	0.53	0.347577
Basidiomycota	Agaricomycetes	Agaricales	Strophariaceae	Pholiota	Saprotroph	Probable	0.457283	0.857372	1.75744	0.272143	0.616995	0.0411905	0.0762987	0.0164286	0.0357143
Basidiomycota	Agaricomycetes	Sebacinales	Sebacinaceae	Sebacina	Ectomycorrhiza	Probable	0.435224	0.327152	0.877232	0.0707143	0.0929803	0.547619	0.888799	0.162857	0.623087
Ascomycota	Lecanoromycetes	Lecanorales	Parmeliaceae	Parmelia	Others (Lichenized)	Highly Probable	0.40838	0.575778	0.337054	1.10714	0.315271	0.234286	0.169643	0.305	0.221939
Basidiomycota	Agaricomycetes	Polyporales	Polyporaceae	Coriolopsis	Saprotroph	Probable	0.401494	0.78457	1.6808	0.242857	0.509852	0.00309524	0	0.00928571	0
Basidiomycota	Agaricomycetes	Trechisporales	Hydnodontaceae	Trechispora	Saprotroph	Highly Probable	0.378852	0.0480769	0.078125	0.0371429	0.0326355	0.722857	0.669643	0.142143	1.28316
Basidiomycota	Agaricomycetes	Thelephorales	Bankeraceae	Boletopsis	Ectomycorrhiza	Highly Probable	0.357376	0.0336538	0.0982143	0.01	0.000615764	0.694048	0.181006	0.0642857	1.65944
Ascomycota	Leotiomycetes	Thelebolales	Pseudeurotiaceae	Pseudogymnoascus	Saprotroph	Probable	0.355159	0.309753	0.189732	0.468571	0.272167	0.402381	0.560877	0.510714	0.181122
Basidiomycota	Agaricomycetes	Trechisporales	Hydnodontaceae	Luellia	Saprotroph	Probable	0.346172	0.603251	1.20833	0.548571	0.149631	0.0788095	0.116071	0.0921429	0.0376276
Basidiomycota	Agaricomycetes	Cantharellales	Clavulinaceae	Clavulina	Ectomycorrhiza	Highly Probable	0.311975	0.0824176	0.142113	0.0378571	0.0714286	0.550714	0.327922	0.201429	1.03763
Ascomycota	Sordariomycetes	Hypocreales	Ophiocordycipitaceae	Tolypocladium	Endophyte	Probable	0.306839	0.178571	0.269345	0.227857	0.0609606	0.440238	0.717532	0.495714	0.172832
Mucoromycota	Mucoromycetes	Mucorales	Mucoraceae	Mucor	Saprotroph	Probable	0.301937	0.575092	0.0825893	0.259286	1.25493	0.0178571	0.0251623	0.015	0.0146684
Basidiomycota	Agaricomycetes	Cantharellales	Cantharellaceae	Craterellus	Ectomycorrhiza	Highly Probable	0.255369	0.0249542	0.0111607	0.000714286	0.057266	0.495	0.0349026	0.0378571	1.26467
Basidiomycota	Agaricomycetes	Agaricales	Lyophyllaceae	Gerhardtia	Ectomycorrhiza	Probable	0.243697	0.0270147	0.0662202	0.00857143	0.010468	0.469048	0.198864	0.198571	0.922832
Basidiomycota	Agaricomycetes	Cantharellales	Clavulinaceae	Membranomyces	Ectomycorrhiza	Highly Probable	0.24043	0.21337	0.181548	0.248571	0.20936	0.268571	0.0503247	0.173571	0.524872
Ascomycota	Sordariomycetes	Hypocreales	Nectriaceae	Ilyonectria	Others (Plant pathogen)	Probable	0.237628	0.269918	0.0863095	0.183571	0.496305	0.204048	0.133929	0.115	0.338648
Ascomycota	Dothideomycetes	Tubeufiales	Tubeufiaceae	Helicoma	Saprotroph	Probable	0.237045	0.18956	0.120536	0.312857	0.140394	0.286429	0.0900974	0.498571	0.251276
Ascomycota	Eurotiomycetes	Eurotiales	Trichocomaceae	Sagenomella	Saprotroph	Probable	0.229809	0.0709707	0.0535714	0.0785714	0.0788177	0.395	0.495942	0.386429	0.323342
Basidiomycota	Agaricomycetes	Boletales	Boletaceae	Xanthoconium	Ectomycorrhiza	Highly Probable	0.228992	0.0641026	0.203125	0.005	0	0.400476	1.36201	0.00214286	0.000637755
Ascomycota	Leotiomycetes	Helotiales	Hyaloscyphaceae	Lachnum	Saprotroph	Probable	0.181606	0.339057	0.0848214	0.246429	0.62931	0.0178571	0.0381494	0.0107143	0.00829082
Ascomycota	Leotiomycetes	Helotiales	Helotiales_fam_Incertae_sedis	Chalara	Saprotroph + endophyte	Probable	0.177171	0.174679	0.131696	0.195714	0.192118	0.179762	0.0438312	0.365	0.121173
Basidiomycota	Tremellomycetes	Filobasidiales	Piskurozymaceae	Solicoccozyma	Saprotroph	Probable	0.172852	0.0803571	0.061756	0.055	0.117611	0.269048	0.195617	0.15	0.433036
Ascomycota	Eurotiomycetes	Chaetothyriales	Herpotrichiellaceae	Exophiala	Saprotroph	Probable	0.168067	0.105769	0.158482	0.065	0.0972906	0.232857	0.149351	0.39	0.158163
Mucoromycota	Mucoromycotina_cls_Incertae_sedis	Mucoromycotina_ord_Incertae_sedis	Mucoromycotina_fam_Incertae_sedis	Bifiguratus	Saprotroph + endophyte	Probable	0.161531	0.0215201	0.0267857	0.0157143	0.0221675	0.307143	0.500812	0.323571	0.140306
Ascomycota	Leotiomycetes	Helotiales	Hyaloscyphaceae	Hyaloscypha	Saprotroph	Probable	0.153361	0.198489	0.426339	0.131429	0.067734	0.106429	0.17776	0.0664286	0.0860969
Basidiomycota	Agaricomycetes	Agaricales	Tricholomataceae	Hydropus	Saprotroph	Probable	0.152077	0.297619	0.220982	0.701429	0.012931	0.000714286	0.00162338	0.000714286	0
Ascomycota	Leotiomycetes	Helotiales	Dermateaceae	Cryptosporiopsis	Saprotroph	Probable	0.145775	0.168956	0.0178571	0.03	0.413793	0.121667	0.0730519	0.0178571	0.252551
Basidiomycota	Agaricomycetes	Boletales	Gomphidiaceae	Gomphidius	Ectomycorrhiza	Probable	0.144958	0.260073	0.170387	0.153571	0.426108	0.0252381	0.00568182	0.0428571	0.0248724
Basidiomycota	Agaricomycetes	Agaricales	Omphalotaceae	Marasmiellus	Saprotroph	Probable	0.139589	0.270604	0.125744	0.175714	0.472291	0.00333333	0.00649351	0.00142857	0.00255102
Ascomycota	Leotiomycetes	Helotiales	Helotiaceae	Mycosymbioces	Ectomycorrhiza	Probable	0.136671	0.124542	0.0171131	0.0307143	0.294335	0.149286	0.0974026	0.177857	0.164541
Mucoromycota	Mucoromycetes	Mucorales	Cunninghamellaceae	Cunninghamella	Saprotroph	Probable	0.127334	0.217262	0.113095	0.0507143	0.447044	0.0338095	0.0535714	0.0378571	0.0146684
Basidiomycota	Agaricomycetes	Agaricales	Tricholomataceae	Roridomyces	Saprotroph	Probable	0.126751	0.248626	0.000744048	0	0.668103	0	0	0	0
Ascomycota	Sordariomycetes	Sordariales	Chaetomiaceae	Humicola	Saprotroph	Probable	0.119631	0.109203	0.0416667	0.0978571	0.174877	0.130476	0.103896	0.151429	0.132653
Basidiomycota	Tritirachiomycetes	Tritirachiales	Tritirachiaceae	Paratritirachium	Saprotroph	Probable	0.10936	0.0311355	0.0111607	0.0378571	0.0418719	0.190714	0.0738636	0.025	0.430485
Ascomycota	Sordariomycetes	Hypocreales	Clavicipitaceae	Metapochonia	Saprotroph	Possible	0.109127	0.0842491	0.0572917	0.107143	0.0868227	0.135	0.190747	0.146429	0.0809949
Ascomycota	Dothideomycetes	Dothideomycetes_ord_Incertae_sedis	Dothideomycetes_fam_Incertae_sedis	Septonema	Saprotroph	Highly Probable	0.10901	0.136905	0.0907738	0.0971429	0.20936	0.08	0.0771104	0.0707143	0.0905612
Ascomycota	Eurotiomycetes	Eurotiales	Trichocomaceae	Talaromyces	Saprotroph	Probable	0.108193	0.0613553	0.0372024	0.0892857	0.057266	0.156905	0.284903	0.147143	0.065051
